# Supplementary material for: Differential inhibition of PDKs by phenylbutyrate and enhancement of pyruvate dehydrogenase complex activity by combination with dichloroacetate
Source: Springer Nature journal article supplement (doi:10.1007/s10545-014-9808-2), 2015-01-19
Supplement: MOESM1 [file 8835948]

Differential inhibition of PDKs by phenylbutyrate and enhancement of pyruvate dehydrogenase complex activity by combination with dichloroacetate.

*Rosa Ferriero, Clara Iannuzzi, Giuseppe Manco, and Nicola Brunetti-Pierri.*

**Supplementary Figure 1.**

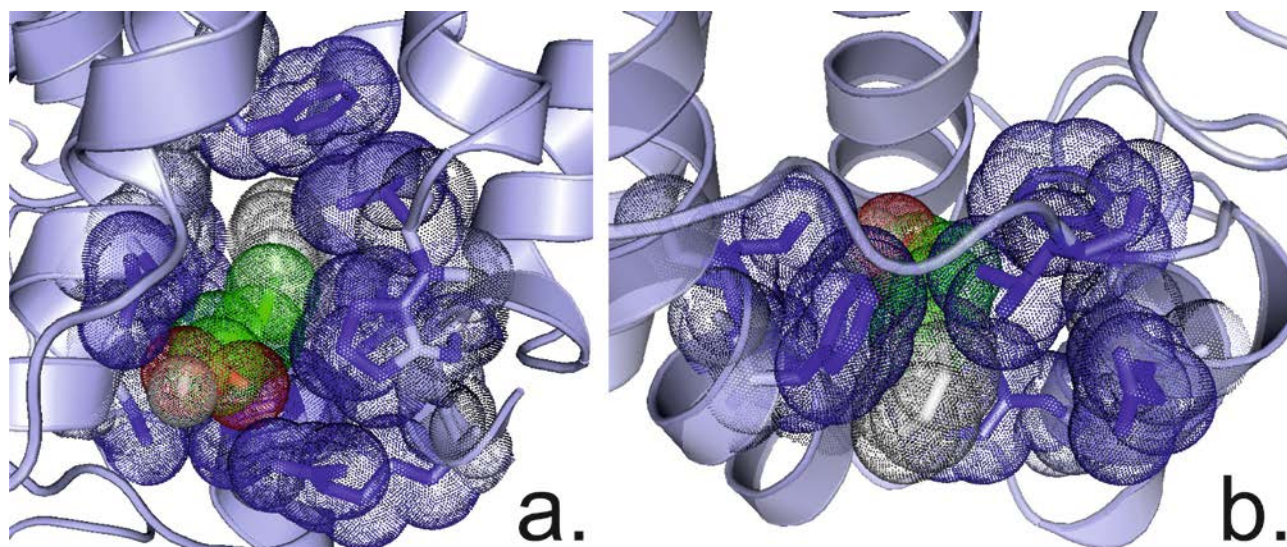

**Supplementary Figure 1.** Putative binding sites of phenylbutyrate on PDK2 (a) and PDK3 (b).

Interactions of phenylbutyrate with amino acid residues at the binding sites include Van der Waals interaction spheres of amino acid residues in contact with the inhibitor.
